# Supplementary material
Source: PubMed Central journal article supplement (PMC3093433)
Supplement: NIHMS274061-supplement-8.pdf [file NIHMS274061-supplement-8.pdf]

## Molecular characterization of transgenic loci from 3 phenotypic classes

|                       |                                                                 | Donor/Target | Donor/Reporter |
|-----------------------|-----------------------------------------------------------------|--------------|----------------|
| <b>GFP+ RFP+ CFP+</b> | <u>Sequencing of PCR products (Primerset 1a)</u>                | <u>36</u>    | <u>20</u>      |
|                       | GFP WT sequence (uncut)                                         | 7            | 0              |
|                       | GFP Deletions (<10bp)                                           | 7            | 0              |
|                       | GFP Deletions (>10bp)                                           | 3            | 4              |
|                       | GFP Insertions (<10bp)                                          | 4            | 1              |
|                       | GFP Insertions (>10bp)                                          | 1            | 0              |
|                       | CFP like sequence*                                              | 14           | 15             |
| <b>GFP- RFP+ CFP+</b> | <u>PCR (Primerset 1a) and <i>NotI</i> digest of PCR product</u> | <u>156</u>   |                |
|                       | Donor sized (HEG+)                                              | 152          |                |
|                       | <i>NotI</i> marker present                                      | 25           |                |
|                       | <i>NotI</i> marker absent                                       | 127          |                |
|                       | Target sized (HEG-)                                             | 4            |                |
| <b>GFP- RFP- CFP+</b> | <u>Sequencing of PCR products (Primers: 2 fwd-1a rev)</u>       | <u>15</u>    |                |
|                       | GFP/CFP recombination**                                         | 5            |                |
|                       | no PCR product                                                  | 10           |                |

---

\* Synthesis-dependent strand annealing using the 3xP3-CFP locus as template could account for these repair events

\*\* The structure of these events indicates that they might have originated through intramolecular recombination via single strand annealing between the homologous regions of the 3xP3-GFP and 3xP3-CFP genes leading to the loss of the interjacent RFP marker.
