# Supplementary material
Source: PubMed Central journal article supplement (PMC3093433)

**a**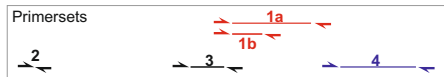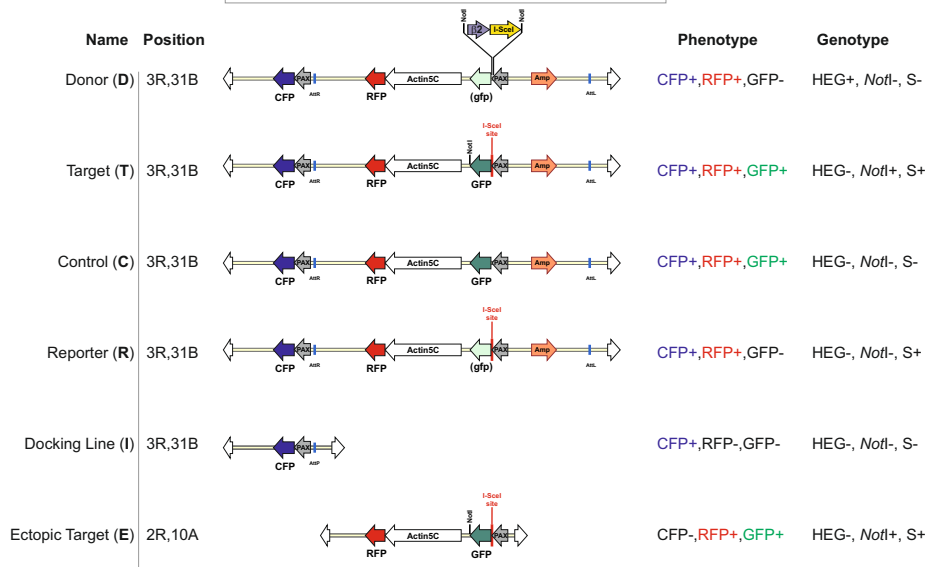**b**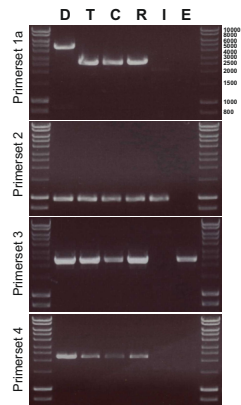**c**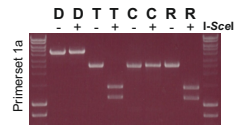

Supplement: NIHMS274061-supplement-2.pdf [file NIHMS274061-supplement-2.pdf]

**a**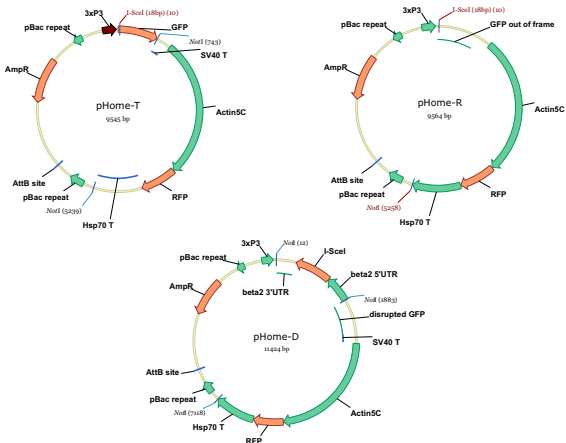**b**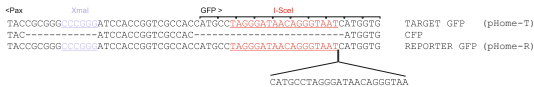

Supplement: NIHMS274061-supplement-3.pdf [file NIHMS274061-supplement-3.pdf]

**a**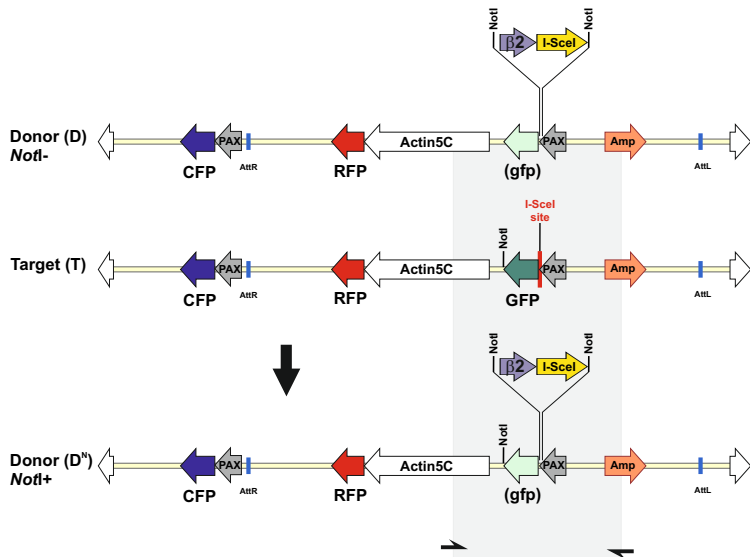**b**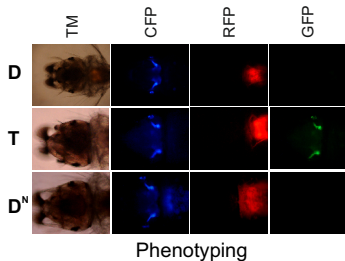**c**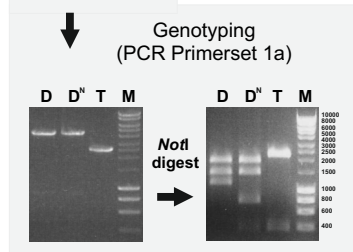

Supplement: NIHMS274061-supplement-4.pdf [file NIHMS274061-supplement-4.pdf]

**a**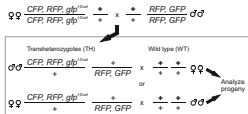**b**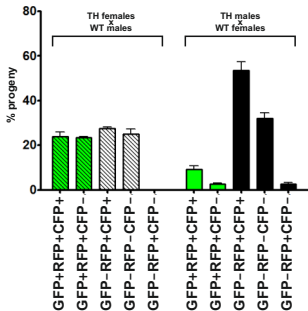

Supplement: NIHMS274061-supplement-5.pdf [file NIHMS274061-supplement-5.pdf]

**a** Population Genetic Model (HEG allele starting frequency: 10%)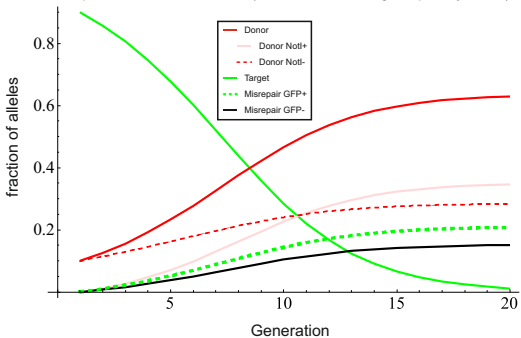**b** Cage I phenotyping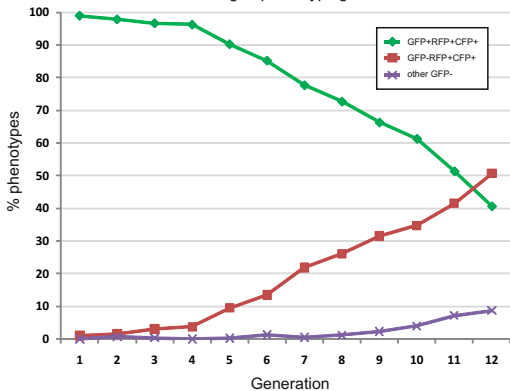

Supplement: NIHMS274061-supplement-6.pdf [file NIHMS274061-supplement-6.pdf]

**a**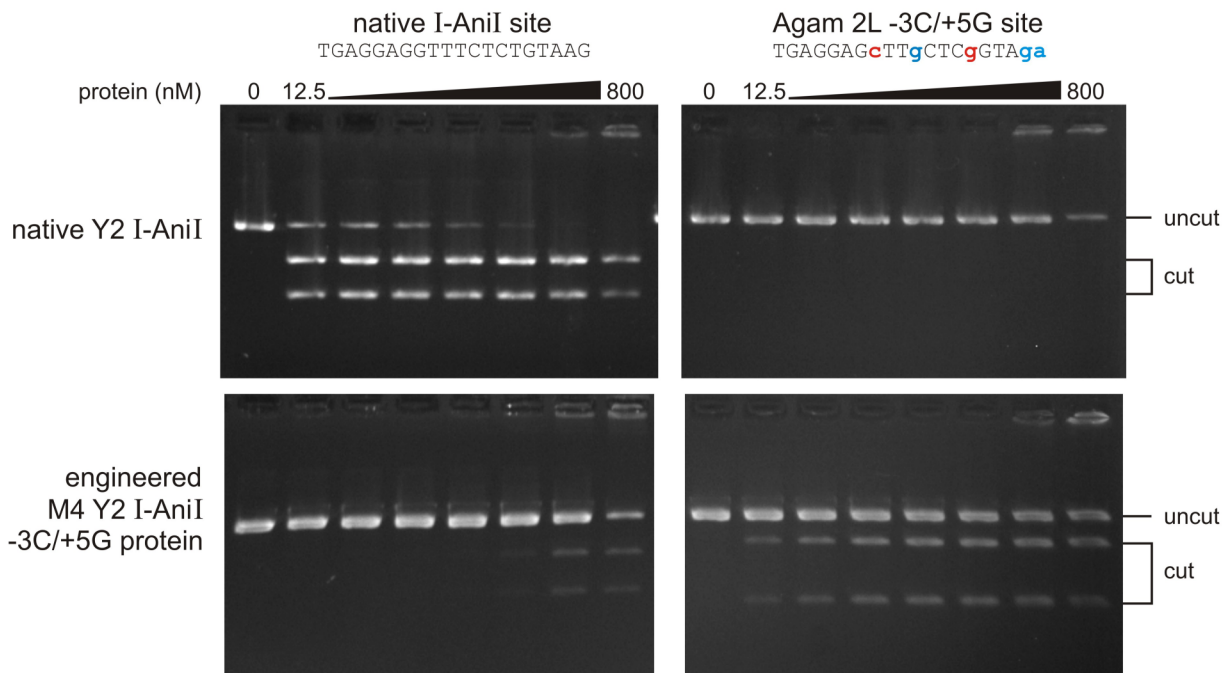**b**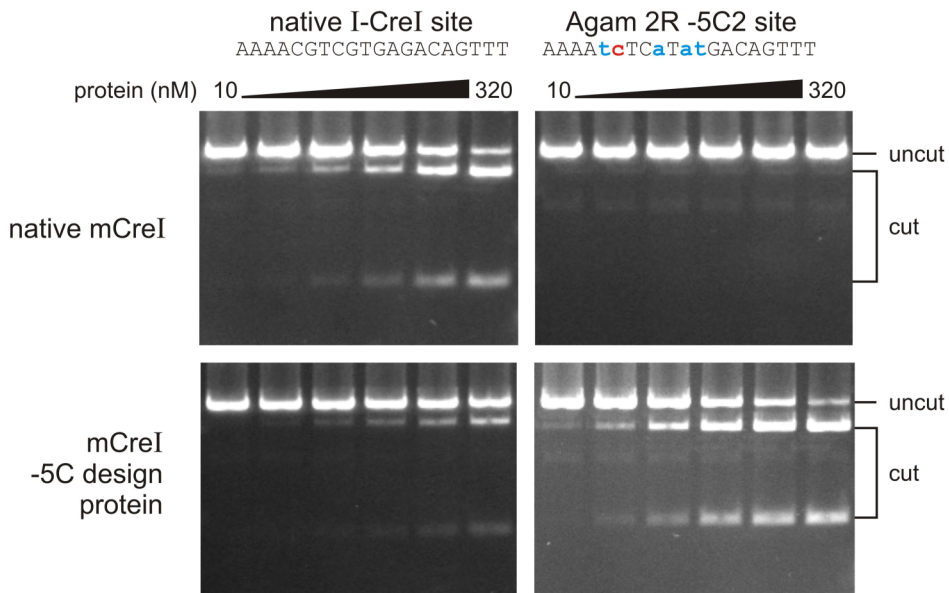

Supplement: NIHMS274061-supplement-7.pdf [file NIHMS274061-supplement-7.pdf]
